# Supplementary material
Source: publisher site journal article supplement (https://www.dovepress.com/article/454263)
Supplement: Supplementary file 1 [file get_supplementary_file.php]

**Supplementary Table 1. Laboratory Test Names and Criteria for Adverse Events of Special Interest**

| Category | Laboratory Test Name | Criteria |
| --- | --- | --- |
| Hyperglycemia | Glucose [Mass/volume] in Serum or Plasma | ≥200 mg/dL |
| Glucose [Mass/volume] in Capillary blood by Glucometer | ≥200 mg/dL |
| Liver dysfunction | Alanine aminotransferase [Enzymatic activity/volume] in Serum or Plasma | >120 IU/L  (>3 × ULN) |
| Aspartate aminotransferase [Enzymatic activity/volume] in Serum or Plasma | >120 IU/L  (>3 × ULN) |
| Hyperbilirubinemia | Total Bilirubin [Mass/volume] in Serum or Plasma | >1.8 mg/dL  (>1.5 × ULN) |
| Direct Bilirubin [Mass/volume] in Serum or Plasma | >0.75 mg/dL  (>1.5 × ULN) |
| Hyperlipidemia | Triglyceride [Mass/volume] in Serum or Plasma | >300 mg/dL |
| Pancreatitis | Amylase [Enzymatic activity/volume] in Serum or Plasma | >150 IU/L  (>1.5 × ULN) |
| Lipase [Enzymatic activity/volume] in Serum or Plasma | >90 IU/L  (>1.5 × ULN) |

**Supplementary Table 2. Odds Ratios for Tumor Lysis Syndrome Based on Selected Covariates from Reduced Logistic Regression Model after Backward Elimination**

|  | Odds ratio (95% confidence interval) | p-value |
| --- | --- | --- |
| Age at ALL diagnosis | 1.18 (0.98, 1.43) | 0.088 |
| Sex: Male | 4.46 (1.46, 13.61) | 0.01 |
| WBC | 1.01 (1, 1.02) | 0.001 |
| Hemoglobin | 0.75 (0.57, 0.98) | 0.04 |
| Platelet | 0.99 (0.98, 0.99) | 0.006 |
| Phosphorous | 1.33 (0.84, 2.11) | 0.224 |
| Potassium | 0.41 (0.21, 0.81) | 0.006 |
| BUN | 0.88 (0.79, 0.99) | 0.042 |
| Creatinine | 14.97 (1.32, 169.8) | 0.027 |
| Risk: Standard Risk | 0.04 (<0.01, 0.31) | 0.016 |
| Risk: High Risk | 0.02 (<0.01, 0.25) | 0.018 |
| Premedication with rasburicase: Yes | 4.62 (1.29, 16.6) | 0.02 |


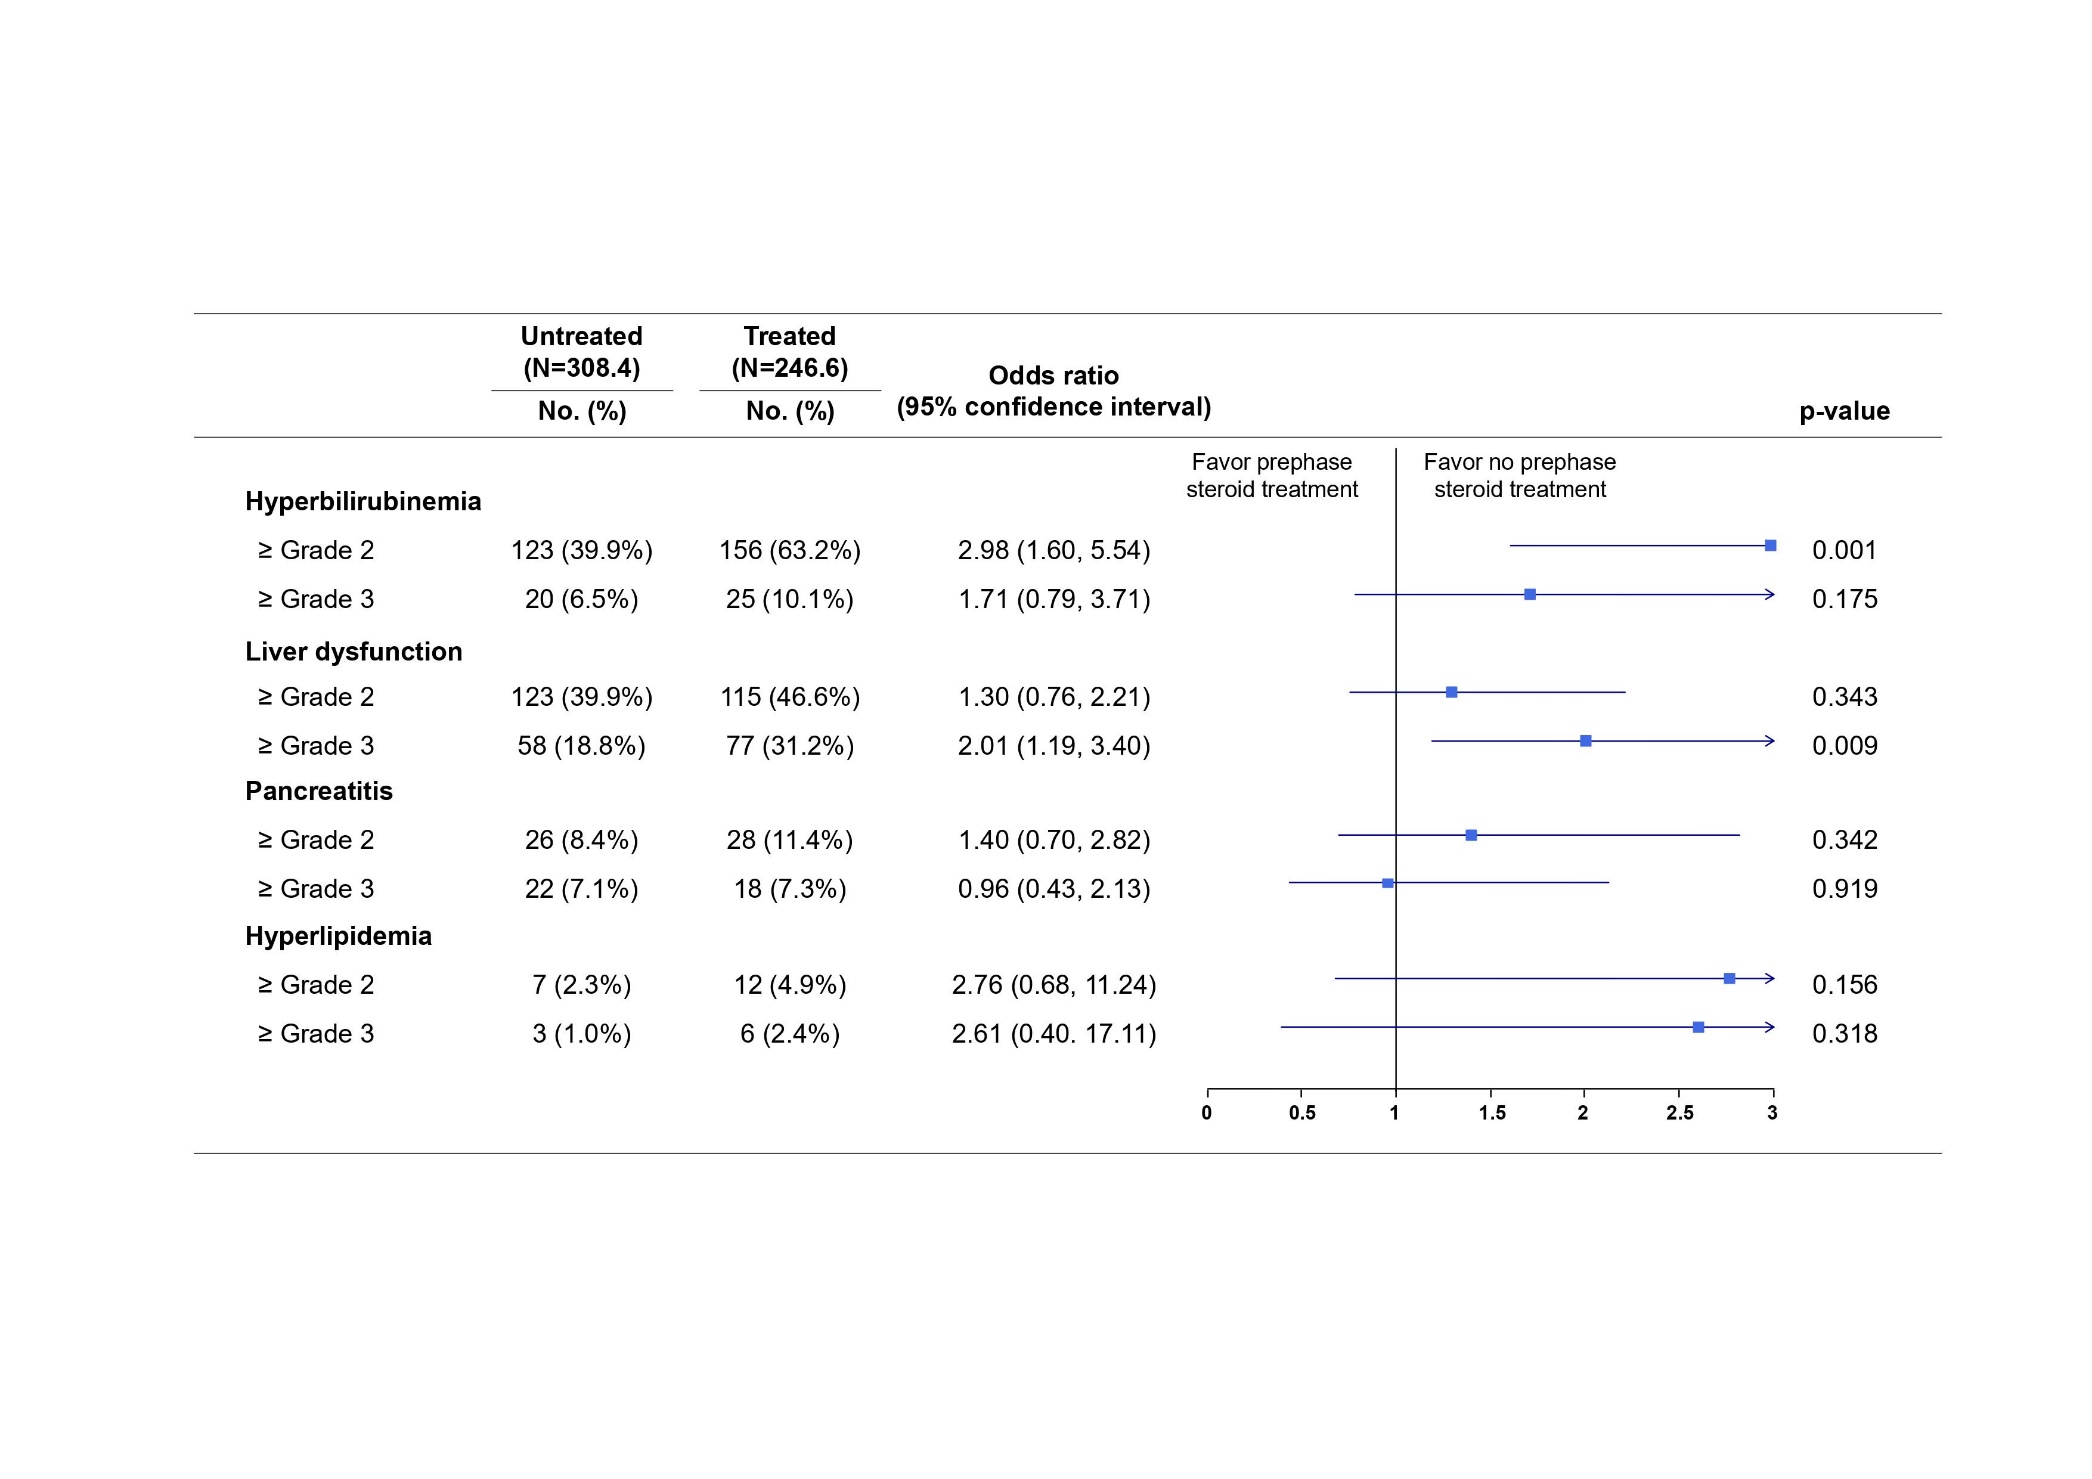


**Supplementary Figure 1.** **Odds Ratios for Adverse Events of Special Interest Across Varying Severity Thresholds**
